# Supplementary material
Source: Springer Nature journal article supplement (https://www.springermedizin.de/resource/supplementary/12885_2011_2937_MOESM2_ESM.pdf/9462322)

Mean

Month

Year

70  
60  
50  
40  
30

Jan Feb Mar Apr May Jun Jul Aug Sep Oct Nov Dec 2004 2005 2006 2007 2008 2009

Month

Year

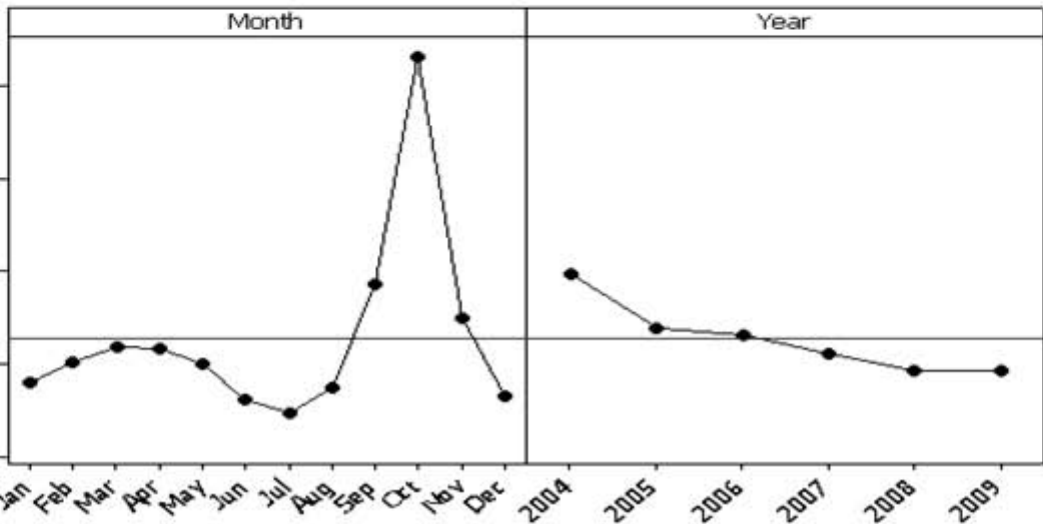

Supplement: MOESM2 [file 9462322]
